# Supplementary material
Source: MDPI journal article supplement (https://www.mdpi.com/2673-8112/3/4/39)
Supplement: s1 [file s1]

**Table S1: Sociodemographic and health-related questions**

| <b>Turkish (Language used for data collection)</b>                                                                                                                                                                                                      | <b>English</b>                                                                                                                                                                                                |
|---------------------------------------------------------------------------------------------------------------------------------------------------------------------------------------------------------------------------------------------------------|---------------------------------------------------------------------------------------------------------------------------------------------------------------------------------------------------------------|
| Cinsel kimliğinizi nasıl tanımlarsınız?<br><input type="radio"/> Kadın<br><input type="radio"/> Erkek<br><input type="radio"/> Diğer                                                                                                                    | How would you describe your gender?<br><input type="radio"/> Male<br><input type="radio"/> Female<br><input type="radio"/> Other                                                                              |
| Yaşınızı belirtiniz.<br><input type="radio"/> 18-34<br><input type="radio"/> 35-50<br><input type="radio"/> 51-65                                                                                                                                       | Select your age.<br><input type="radio"/> 18-34<br><input type="radio"/> 35-50<br><input type="radio"/> 51-65                                                                                                 |
| Ekonomik olarak kendinizi güvende hissediyor musunuz?<br><input type="radio"/> Evet<br><input type="radio"/> Hayır                                                                                                                                      | Do you feel financially secure?<br><input type="radio"/> Yes<br><input type="radio"/> No                                                                                                                      |
| Bakmakla yükümlü olduğunuz biri ya da birileri var mı?<br><input type="radio"/> Evet<br><input type="radio"/> Hayır                                                                                                                                     | Is there anyone whom you are responsible for looking after?<br><input type="radio"/> Yes<br><input type="radio"/> No                                                                                          |
| Covid-19 geçmişiniz bulunmakta mıdır?/<br>Daha önce koronavirüse yakalandınız mı?<br><input type="radio"/> Evet<br><input type="radio"/> Hayır                                                                                                          | Have you ever had COVID-19 infection?<br><input type="radio"/> Yes<br><input type="radio"/> No                                                                                                                |
| Kendinizi hangi sosyoekonomik grupta/gelir grubunda görüyorsunuz? – Düşük orta yüksek<br><input type="radio"/> Düşük<br><input type="radio"/> Orta<br><input type="radio"/> Yüksek                                                                      | What is your perceived socioeconomic status/income group?<br><input type="radio"/> Low<br><input type="radio"/> Middle<br><input type="radio"/> High                                                          |
| Sigara kullanım alışkanlığına göre aşağıdakilerden hangisi sizi en iyi tanımlar ?<br><input type="radio"/> Kullanmıyorum<br><input type="radio"/> Sosyal içici (günde 10 sigaradan az)<br><input type="radio"/> Kullanıyorum (günde 10 sigaradan fazla) | Which of the following best describes your smoking habit?<br><input type="radio"/> Not smoking<br><input type="radio"/> Social smoker (less than 10 a day)<br><input type="radio"/> User (more than 10 a day) |
| Herhangi bir hastalığınız var mı ?<br><input type="radio"/> Hiç biri<br><input type="radio"/> Psikolojik Rahatsızlık/Bozukluk<br><input type="radio"/> Kronik Hastalık<br><input type="radio"/> Her ikisinde                                            | Do you have any disease/disorder?<br><input type="radio"/> None<br><input type="radio"/> Psychological disorder<br><input type="radio"/> Chronic illness<br><input type="radio"/> Both                        |

|                                                                                                                                                                                                                                                                                                                                                       |                                                                                                                                                                                                                                                                                                                                                                                             |
|-------------------------------------------------------------------------------------------------------------------------------------------------------------------------------------------------------------------------------------------------------------------------------------------------------------------------------------------------------|---------------------------------------------------------------------------------------------------------------------------------------------------------------------------------------------------------------------------------------------------------------------------------------------------------------------------------------------------------------------------------------------|
| <p>Çevrenizde daha önce Covid-19 geçmişİ olan kimse var mı? (tanı/ hastaneye yatış vb.)</p> <ul style="list-style-type: none"> <li><input type="radio"/> Evet</li> <li><input type="radio"/> Hayır</li> </ul>                                                                                                                                         | <p>Is there anyone around you who has ever been infected by Covid-19? (diagnosed, hospitalised etc.)</p> <ul style="list-style-type: none"> <li><input type="radio"/> Yes</li> <li><input type="radio"/> No</li> </ul>                                                                                                                                                                      |
| <p>Pandemi sürecinde kendinizi sosyal anlamda izole hissettiniz mi?</p> <ul style="list-style-type: none"> <li><input type="radio"/> Evet</li> <li><input type="radio"/> Hayır</li> </ul>                                                                                                                                                             | <p>Have you felt socially isolated during the pandemic?</p> <ul style="list-style-type: none"> <li><input type="radio"/> Yes</li> <li><input type="radio"/> No</li> </ul>                                                                                                                                                                                                                   |
| <p>Eğitim durumunuz nedir?</p> <ul style="list-style-type: none"> <li><input type="radio"/> ilkokul Mezunu</li> <li><input type="radio"/> Orta okul mezunu</li> <li><input type="radio"/> Lise öğrencisi/mezunu</li> <li><input type="radio"/> Üniversite öğrencisi/mezunu</li> <li><input type="radio"/> Yüksek lisans öğrencisi ve üzeri</li> </ul> | <p>What is your education level?</p> <ul style="list-style-type: none"> <li><input type="radio"/> Primary school graduate</li> <li><input type="radio"/> Mid-secondary school graduate</li> <li><input type="radio"/> Secondary school student/graduate</li> <li><input type="radio"/> University student/graduate</li> <li><input type="radio"/> Postgraduate student or higher</li> </ul> |
